# Supplementary material for: Holter Recordings at Initial Assessment for Long QT Syndrome: Relationship to Genotype Status and Cardiac Events
Source: MDPI journal article supplement (doi:10.3390/jcdd9050164), 2022-05-23
Supplement: s1 [file s1]

**Table S1.** GENE NEGATIVE SEX AGE AT HOLTHOLTER mQT HOLTER mQT mQTc ABOVE HOLTER mRT HOLTER mRT mRTPc ABOVE  
FIRST QTc PROLONGED QTc 500 FIRST ECG ABFIRST ECG ABOVE 500ms age at 1/7/16.

| 1  | F | 4  | 410 | 454 | -44 | 286 | 319 | -33 | 387 | 460 | 500 | -73  | -113 | 16.2849315 |
|----|---|----|-----|-----|-----|-----|-----|-----|-----|-----|-----|------|------|------------|
| 2  | F | 6  | 422 | 454 | -32 | 299 | 319 | -20 | 430 | 460 | 500 | -30  | -70  | 6.19178082 |
| 3  | F | 6  | 486 | 454 | 32  | 319 | 319 | 0   | 411 | 460 | 500 | -49  | -89  | 22.7150685 |
| 4  | F | 8  | 450 | 454 | -4  | 324 | 319 | 5   | 478 | 460 | 500 | 18   | -22  | 24.7369863 |
| 5  | F | 9  | 419 | 454 | -35 | 277 | 319 | -42 | 420 | 460 | 500 | -40  | -80  | 23.5616438 |
| 6  | F | 10 | 445 | 454 | -9  | 240 | 319 | -79 | 426 | 460 | 500 | -34  | -74  | 26.4520548 |
| 7  | F | 11 | 411 | 454 | -43 | 269 | 319 | -50 | 424 | 460 | 500 | -36  | -76  | 16.860274  |
| 8  | F | 13 | 434 | 454 | -20 | 300 | 319 | -19 | 398 | 460 | 500 | -62  | -102 | 15.7835616 |
| 9  | F | 15 | 428 | 454 | -26 | 306 | 319 | -13 | 422 | 460 | 500 | -38  | -78  | 25.2712329 |
| 10 | F | 16 | 432 | 454 | -22 | 276 | 319 | -43 | 425 | 470 | 500 | -45  | -75  | 30.0136986 |
| 11 | F | 19 | 430 | 454 | -24 | 289 | 319 | -30 | 362 | 470 | 500 | -108 | -138 | 26.6410959 |
| 12 | F | 21 | 428 | 454 | -26 | 293 | 319 | -26 | 456 | 470 | 500 | -14  | -44  | 34.3178082 |
| 13 | F | 37 | 457 | 454 | 3   | 303 | 319 | -16 | 411 | 470 | 500 | -59  | -89  | 53.5452055 |
| 14 | F | 50 | 429 | 454 | -25 | 294 | 319 | -25 | 399 | 470 | 500 | -71  | -101 | 63.4027397 |
| 15 | M | 2  | 412 | 454 | -42 | 263 | 319 | -56 | -   | 460 | 500 | -    | -    | 13.9780822 |
| 16 | M | 2  | 406 | 454 | -48 | 270 | 319 | -49 | 409 | 460 | 500 | -51  | -91  | 18.6328767 |
| 17 | M | 4  | 488 | 454 | 34  | 337 | 319 | 18  | -   | 460 | 500 | -    | -    | 20.5808219 |
| 18 | M | 5  | 432 | 454 | -22 | 290 | 319 | -29 | 426 | 460 | 500 | -34  | -74  | 19.1808219 |
| 19 | M | 5  | 400 | 454 | -54 | 254 | 319 | -65 | 435 | 460 | 500 | -25  | -65  | 11.1726027 |
| 20 | M | 6  | 407 | 454 | -47 | 285 | 319 | -34 | 350 | 460 | 500 | -110 | -150 | 17.6246575 |
| 21 | M | 7  | 462 | 454 | 8   | 299 | 319 | -20 | 426 | 460 | 500 | -34  | -74  | 23.490411  |
| 22 | M | 9  | 460 | 454 | 6   | 310 | 319 | -9  | 465 | 460 | 500 | 5    | -35  | 25.660274  |
| 23 | M | 12 | 498 | 454 | 44  | 348 | 319 | 29  | 441 | 460 | 500 | -19  | -59  | 28.460274  |
| 24 | M | 13 | 416 | 454 | -38 | 281 | 319 | -38 | 391 | 460 | 500 | -69  | -109 | 27.7917808 |
| 25 | M | 45 | 418 | 446 | -28 | 270 | 314 | -44 | 419 | 450 | 500 | -31  | -81  | 45.0630137 |
| 26 | M | 48 | 433 | 446 | -13 | 276 | 314 | -38 | 418 | 450 | 500 | -32  | -82  | 61.9068493 |
| 27 | M | 51 | 468 | 446 | 22  | 303 | 314 | -11 | 441 | 450 | 500 | -9   | -59  | 50.7150685 |
| 28 | M | 54 | 424 | 446 | -22 | 289 | 314 | -25 | 440 | 450 | 500 | -10  | -60  | 53.7561644 |
